# Supplementary material
Source: ML conference proceedings conference paper supplement (https://openaccess.thecvf.com/content/CVPR2026/html/Nie_Transition_Matching_Distillation_CVPR_2026_paper.html)
Supplement: Supplementary file 1 [file Nie_Transition_Matching_Distillation_CVPR_2026_supplemental.pdf]

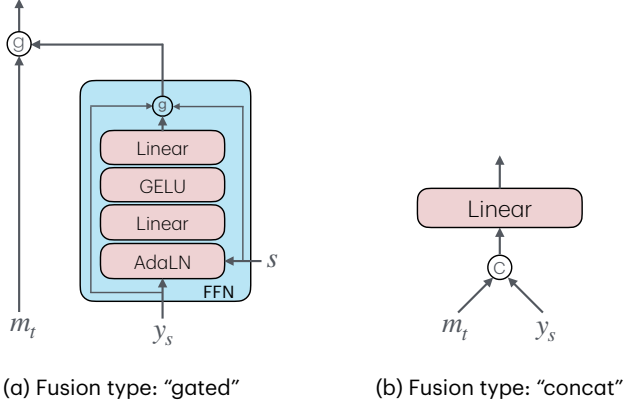

Figure 8. Visualization of our mechanisms to fuse the main backbone’s features  $m(x, t)$  with the flow head input  $y_s$ : (a) “gated” fusion, where the flow head input  $y_s$  is passed to an FFN block (conditioned on the flow head timestep  $s$ ) and then added to the main feature  $m_t$  via a gated operator; and (b) “concat” fusion, where the the flow head input  $y_s$  and the main feature  $m_t$  are concatenated in the channel dimension and then passed to the linear projection layer.

## A. Implementation details

### A.1. Flow head conditioning

**Time conditioning.** For the flow head, we re-use the default time embedding to embed  $s$  and instantiate an additional zero-initialized time embedding that embeds the difference  $s - r$  between two time steps of the flow map (see Section 2). The two embeddings are summed and used as the conditioning input to the adaptive normalization layers in the DiT blocks of the flow head.

**Inner flow fusion.** To fuse the main backbone’s features  $m(x, t)$  with the flow head input  $y_s$ , we first process  $y_s$  with the patch embedding layer of the main backbone. Then we process the patches using a randomly initialized AdaLN-style block (analogous to the ones used in the teacher model, *i.e.*, consisting of adaptive layer normalization, an MLP, and a gated residual connection) conditioned on the embedding of  $s$  and re-using the global scale and shift values. Finally, we fuse this processed flow head input with the main backbone’s features using a gated interpolation, controlled by a global gate derived from a sigmoid-activated learnable parameter. This makes the flow head’s contribution both time-aware and dynamically gated at the feature level before the final global fusion. We visualize the fusion mechanism in Figure 8 and provide an ablation w.r.t. other conditioning types in Section B.3.

### A.2. TM-MF

**Pretraining recipe.** To better align TM-MF pretraining with the multi-step inference strategy used in our distilla-

---

### Algorithm 1 TMD inference

---

```

 $x \sim \mathcal{N}(0, I)$ 
for  $i = M$  to 1 do
   $m = m_\theta(x, t_i)$  ▷ Main backbone
   $x = x - (t_i - t_{i-1})\text{INNERFLOW}(m)$  ▷ See Eq. (4)
return  $x$  ▷ Generated data

def INNERFLOW( $m$ )
   $y \sim \mathcal{N}(0, I)$ 
  for  $j = N$  to 1 do
     $y = f_\theta(y, s_j, s_{j-1}; m)$  ▷ Flow head
  return  $y$ 

```

---

tion setup, we modify the sampling scheme of  $(s, r)$  compared to the continuous formulation in [17]. First, analogous to  $t_{\text{student}}$  in the outer flow of DMD2- $v$ , we also use a shifting function with  $\gamma = 10$  for  $s_{\text{student}}$ , *i.e.*, the values defining the time grid<sup>2</sup>  $0 = s_0 < s_1 < \dots < s_N = 1$ . Secondly, analogous to sampling the timestep  $t_{\text{dmd}}$  in DMD2- $v$ , we also sample  $s_{\text{mf}}$  during TM-MF training uniformly and shift it (using  $\gamma = 3$ ). Then, we pick  $r = s_k$  where  $k := \max\{j : s_j \leq s_{\text{mf}}\}$ . Empirically, this discrete sampling scheme is not only tailored to our Stage 2 distillation but also substantially stabilizes TM-MF pretraining.

Our remaining design choices largely follow Geng et al. [17]. We set  $r = s$  for 75% of training batches to stabilize optimization under the flow-matching loss, apply condition dropout (using the negative prompt in Table 8) during training, and construct the velocity field using classifier-free guidance. We observed that mixing conditional and unconditional network-predicted velocities (Eq. (18) in [17]) offers no clear benefit in our setting, so we adopt the standard classifier-free guidance formulation throughout. Moreover, we also use an adaptive loss normalization, such that our final loss derived from (9) is given by

$$\mathbb{E}_{s,r,y_s} \left[ \frac{\|\mathbf{u}_\theta(\mathbf{y}_s, s, r) - \hat{\mathbf{u}}\|^2}{\text{sg}(\|\mathbf{u}_\theta(\mathbf{y}_s, s, r) - \hat{\mathbf{u}}\|^2) + c} \right],$$

where we choose  $c = d$  for Wan2.1 1.3B and  $c = \frac{d}{10^5}$  for Wan2.1 14B (where  $d$  is the dimension of  $\mathbf{y}_s$ ).

**Finite difference approximation.** Computing the JVP term in the MeanFlow objective, namely  $\frac{d}{ds}\mathbf{u}_\theta(\mathbf{y}_s, s, r)$ , using forward-mode automatic differentiation in PyTorch is currently incompatible with system optimizations, such as flash attention and FSDP; however, these optimizations are crucial to avoid out-of-memory issues due to the long video sequence length. To address this and make our method agnostic of different training techniques, we approximate the JVP using a *central difference scheme*. For a step size  $\delta$ , we

---

<sup>2</sup>Note that, in practice, we set  $t_M = s_N = 0.999$  instead of 1 to align with the pretraining of Wan.

| Hyperparameter                                                     | Wan2.1 1.3B (T2V)                     | Wan2.1 14B (T2V)                  |
|--------------------------------------------------------------------|---------------------------------------|-----------------------------------|
| <b>General Settings</b>                                            |                                       |                                   |
| Resolution                                                         | 480 × 832 (480P)                      |                                   |
| Frame count                                                        | 81 Frames (5s)                        |                                   |
| Latent dimension ( $T \times H \times W$ )                         | 21 × 60 × 104                         |                                   |
| Dataset size                                                       | 500k (479k after filtering)           |                                   |
| Dataset prompts                                                    | VidProm extended by QWEN2.5-7B        |                                   |
| Dataset videos                                                     | Generated by Wan2.1 14B (T2V)         |                                   |
| Optimizer (weight decay, betas, epsilon)                           | AdamW (0.01, (0.9, 0.99), $10^{-8}$ ) |                                   |
| Global batch-size                                                  | 64                                    |                                   |
| Timestep shift $\gamma$ for $t_{\text{student}}$ (see Section 3.2) | 10                                    |                                   |
| Multi-step sampling (see Section A.3)                              | deterministic                         |                                   |
| Precision                                                          | BF16 (time $t$ in FP64)               |                                   |
| GPU type                                                           | NVIDIA A100                           | NVIDIA H100                       |
| Parallelism Strategy                                               | DDP                                   | FSDP                              |
| <b>Baselines</b>                                                   |                                       |                                   |
| <b>KD</b>                                                          |                                       |                                   |
| Number of trajectories                                             | 10k                                   |                                   |
| CFG scale                                                          | 5                                     |                                   |
| Skip-layer                                                         | 10                                    |                                   |
| Learning rate                                                      | 7e-5                                  |                                   |
| Max. iterations                                                    | 10k                                   | 5k                                |
| <b>DMD2-v</b>                                                      |                                       |                                   |
| Fake score architecture                                            | same as teacher                       |                                   |
| Discriminator architecture (see Section 4.3)                       | Conv3D                                |                                   |
| Discriminator parameters                                           | 68M                                   | 172M                              |
| CFG scale                                                          | 5                                     |                                   |
| Layer for discriminator features (see Section A.3)                 | (15, 22, 29)                          | (19, 29, 39)                      |
| Discriminator loss weight $\lambda$ (see Algorithm 2)              | 0.03                                  |                                   |
| Learning rates (student, discriminator, fake score)                | $(10^{-5}, 10^{-5}, 10^{-5})$         |                                   |
| Timestep shift $\gamma$ for $t_{\text{dmd}}$ (see Section 3.2)     | 5                                     |                                   |
| Min./max. for $t_{\text{dmd}}$ and $s_{\text{mf}}$                 | (0.001, 0.999)                        |                                   |
| Student update frequency                                           | every 5-th iteration                  |                                   |
| Max. iterations                                                    | 4k ( $M \geq 2$ ), 12k ( $M = 1$ )    | 1k ( $M \geq 2$ ), 5k ( $M = 1$ ) |
| <b>TMD</b>                                                         |                                       |                                   |
| <b>Stage 1: TM-MF</b>                                              |                                       |                                   |
| CFG scale                                                          | 3                                     |                                   |
| Flow head fuse type (see Section A.1)                              | gated                                 |                                   |
| Timestep shift $\gamma$ for $s_{\text{student}}$ (see Section A.2) | 10                                    |                                   |
| Timestep shift $\gamma$ for $s_{\text{mf}}$ (see Section A.2)      | 3                                     |                                   |
| JVP finite-difference $\delta$ (see Section A.2)                   | $5 \cdot 10^{-3}$                     |                                   |
| Condition dropout probability (see Section A.2)                    | 0.1                                   |                                   |
| Loss normalization constant $c$ (see Section A.2)                  | $d$                                   | $10^{-5}d$                        |
| Learning rate                                                      | $3 \cdot 10^{-5}$                     | $1 \cdot 10^{-5}$                 |
| Max. iterations                                                    | 3k                                    | 3k                                |
| <b>Stage 2: DMD2-v with flow head</b>                              |                                       |                                   |
| All hyperparameters as in DMD2-v above                             |                                       |                                   |

Table 7. Default hyperparameters if not specified otherwise in the experiments.

---

**Algorithm 2** TMD student update step (simplified)
 

---

Given  $\mathbf{x} \sim p_{\text{data}}$ ,  $\mathbf{x}_1 \sim \mathcal{N}(0, I)$ ,  $t_i \sim \text{Unif}(\{t_1, \dots, t_M\})$   
 $\mathbf{x}_{t_i} = (1 - t_i)\mathbf{x} + t_i\mathbf{x}_1$  ▷ See Eq. (4)  
 $\mathbf{m} = \mathbf{m}_\theta(\mathbf{x}_{t_i}, t_i)$  ▷ Main backbone  
**if** stage\_one **then**  
 $\mathbf{y} = \mathbf{x}_1 - \mathbf{x}$  ▷ See Eq. (3)  
 $\mathbf{y}_1 \sim \mathcal{N}(0, I)$ ,  $(s, r) \sim p_{s,r}$   
 $\mathbf{y}_s = (1 - s)\mathbf{y} + s\mathbf{y}_1$  ▷ See Eq. (5)  
 $\mathbf{u} = \mathbf{u}_\theta(\mathbf{y}_s, s, r; \mathbf{m})$  ▷ Avg. velocity  
 $\mathbf{v} = \mathbf{y}_1 - \mathbf{y}$  ▷ Conditional velocity  
 $\mathcal{L} = \text{MeanFlow}(\mathbf{u}, \mathbf{v}, s, r)$  ▷ See Eq. (9)  
**else**  
 $\hat{\mathbf{x}} = \mathbf{x}_1 - \text{INNERFLOW}(\mathbf{m})$  ▷ See Eq. (15) & Algorithm 1  
 $\mathcal{L} = \text{VSD}(\hat{\mathbf{x}}) + \lambda \cdot \text{Discriminator}(\hat{\mathbf{x}})$  ▷ See Eq. (11)  
 $\theta = \text{step}(\theta, \nabla_\theta \mathcal{L})$  ▷ Gradient step

---

*In the style of Vincent van Gogh, an astronaut with a helmet and spacesuit rides a cow on a sandy beach at sunset. The astronaut sits confidently on the cow, which is walking steadily towards the viewer.*

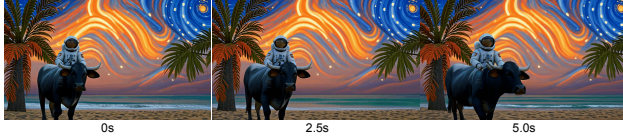

*A cute, fluffy white dog running through a green meadow filled with wildflowers. The dog has bright, expressive brown eyes and a wagging tail. It is playing fetch with a red ball, jumping up to catch it in mid-air.*

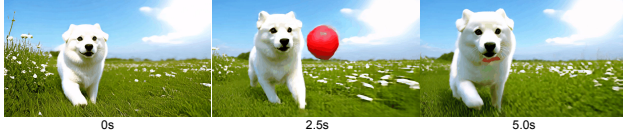

*Retro Ghibli-inspired scene, featuring a charming morning dove going about its daily life. The dove is depicted in a minimalist, flat 2D style with bold lines and minimal shading.*

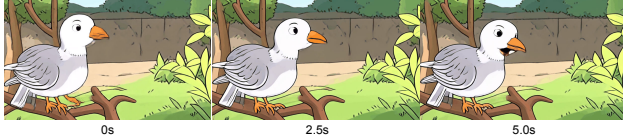

Figure 9. **Mode collapse without time-shifting.** We show videos generated by the one-step student distilled from DMD2 in the setting “ $t_{\text{dmd}}$  w/o shift” (see Table 5), where the other hyperparameters use the default values. We can see that all generated videos have the main characters consistently appear on the left side of the pixel space, which is a sign of the severe mode collapse happening during distillation.

have

$$\frac{d}{ds} \mathbf{u}_\theta(\mathbf{y}_s, s, r) \approx \frac{\mathbf{u}_\theta(\mathbf{y}_{s+\delta}, s + \delta, r) - \mathbf{u}_\theta(\mathbf{y}_{s-\delta}, s - \delta, r)}{2\delta}$$

with  $\mathbf{y}_{s\pm\delta} = \mathbf{y}_s \pm \delta\mathbf{v}(\mathbf{y}_s, s)$ , where we use the conditional velocity for  $\mathbf{v}$ . At the boundaries, we fall back to using one-sided finite-difference approximations. We empirically found that setting  $\delta = 0.005$  yields a satisfactory estimation to the JVP term and fix it throughout our experiments.

### A.3. DMD2

**Initialization.** Since we consider video diffusion models that are trained to approximate the instantaneous velocity  $\mathbf{v}$  in (2), we parametrize the student network as

$$\mathbf{g}_\theta^{\text{student}}(\mathbf{x}_t, t) = \mathbf{x}_t - t\mathbf{v}_\theta(\mathbf{x}_t, t) \quad (17)$$

for our DMD2- $\nu$  baseline, which initially approximates the conditional expectation  $\mathbb{E}[\mathbf{x}|\mathbf{x}_t]$ .

**Multi-step distillation and inference.** Compared to the original multi-step DMD2 [58], we did not use backward simulation for the outer loop for multi-step distillation and efficiently sample  $\mathbf{x}_{t_i}$  using real data.

Moreover, during inference, we use deterministic sampling from the conditional flow, *i.e.*,

$$\mathbf{x}_{t_{i+1}} = \left(1 - \frac{t_{i+1}}{t_i}\right) \mathbf{x}_{t_i} + \frac{t_{i+1}}{t_i} \mathbf{g}^{\text{student}}(\mathbf{x}_{t_i}, t_i), \quad (18)$$

which samples from the correct distribution as long as  $\mathbf{x} \approx \text{Student}(\mathbf{x}_{t_i}, t_i)$ . Compared to the standard resampling scheme in DMD2, *i.e.*,

$$\mathbf{x}_{t_{i+1}} = (1 - t_{i+1}) \mathbf{g}^{\text{student}}(\mathbf{x}_{t_i}, t_i) + t_{i+1} \mathbf{x}_1, \quad (19)$$

the noise  $\mathbf{x}_1$  of the conditional flow is inferred from  $\mathbf{g}^{\text{student}}(\mathbf{x}_{t_i}, t_i)$  and  $\mathbf{x}_{t_i}$  in Eq. (18) and sampled independently in Eq. (19).

For TMD, the multi-step inference is given in Algorithm 1. In particular, the outer transitions are also deterministic, but additional independent noise  $\mathbf{y}_1 \sim \mathcal{N}(0, I)$  is used for the inner flow.

**Teacher, fake score, and discriminator.** While it would be possible to distill Wan2.1 1.3B using the 14B model as teacher in DMD2, we use the 1.3B model for fair comparisons. Moreover, we use (unpatchified) teacher features at different layers as inputs to the discriminator, which we found more stable than using fake score features. The discriminator is trained using an average minimax log-likelihood objective over separate heads for each teacher feature, where the teacher is evaluated at noisy inputs  $(\hat{\mathbf{x}}_t, t)$  (fake data as defined in Section 2) or  $(\mathbf{x}_t, t)$  (real data). The generator loss is given as the average (non-saturating) negative log-likelihood. We initialize the fake score  $\mathbf{g}^{\text{fake}}$  using the teacher parameters, parametrize it analogous to (17), and use denoising score matching to train it on noisy fake data  $(\hat{\mathbf{x}}_t, t)$ . Both the discriminator and fake score are trained for several iterations in between student updates. Finally, we can write our VSD objective in (11) as

$$\mathbb{E}_{t_i, \mathbf{x}_{t_i}, t, \hat{\mathbf{x}}_t} \left[ \text{sg} \left( \frac{\mathbf{g}^{\text{fake}}(\hat{\mathbf{x}}_t, t) - \mathbf{g}^{\text{teacher}}(\hat{\mathbf{x}}_t, t)}{\|\mathbf{g}^{\text{fake}}(\hat{\mathbf{x}}_t, t) - \mathbf{g}^{\text{teacher}}(\hat{\mathbf{x}}_t, t)\|_1} \right)^T \hat{\mathbf{x}} \right],$$

where  $\text{sg}(\cdot)$  denotes the stop-gradient operation, and the teacher is also parametrized analogous to Eq. (17), including CFG with the negative prompt given in Table 8.

### A.4. VBench evaluation

We follow the official evaluation protocol in VBench [22] to test our method. During video sampling, we use standard VBench prompt lists to ensure fair comparisons among different methods. In particular, we rewrite the test prompts (*i.e.*, prompt augmentation) using QWEN/QWEN2.5-7B-

A romantic scene featuring a happy couple dancing salsa in the rain under a large colorful umbrella. They are dressed in elegant evening attire, with the man in a black suit and the woman in a flowing red dress. Both have joyful expressions as they move gracefully to the music, their feet barely touching the wet pavement. Raindrops fall softly around them, creating a misty atmosphere.

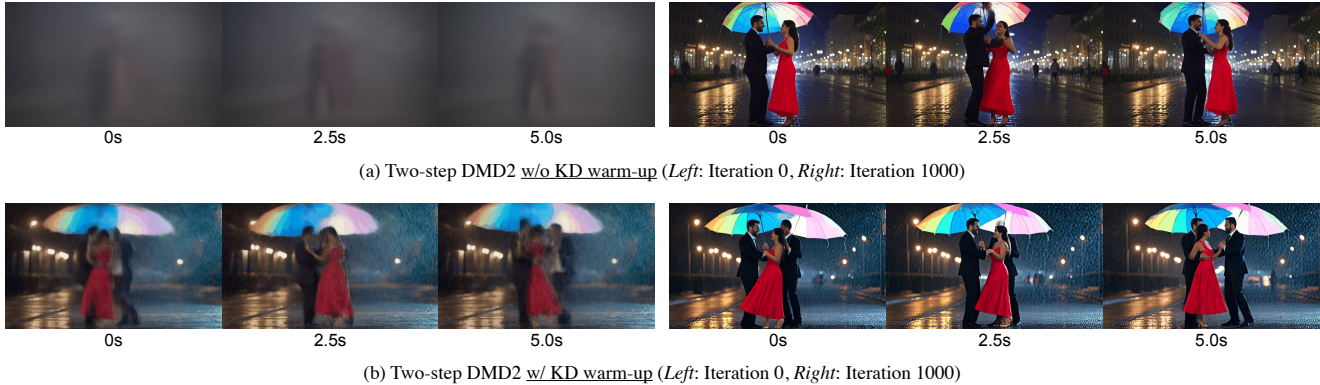

Figure 10. **Effect of KD initialization.** We compare the two-step DMD2 results of distilling Wan2.1 1.3B in two settings: (a) with and (b) without KD warm-up, where (left) “Iteration 0” means videos generated in the beginning of DMD2 training and (Right) “Iteration 1000” means videos generated after training DMD2 for 1k iterations. From left to right, we show the first, middle and the last frames in each video. We can see that the KD warm-up initially can generate better videos, but it also introduces coarse-grained artifacts. For instance, it generates an extra man besides a couple specified in the prompt. After training for 1k iterations, two-step DMD2 cannot remove these artifacts, leading to the worse generation quality than two-step DMD2 without KD warm-up.

INSTRUCT [55], following the prior work [21]. Similarly, almost all the baselines, including Wan2.1 base models, also enhance VBench prompts, making them longer and more descriptive without altering their original meaning. We then calculate scores for 16 Text-to-Video (T2V) evaluation dimensions, respectively, and summarize them into quality score, semantic score and overall score.

In figures from the main text, we only show the short prompts due to the space limit. In Table 8, we show the corresponding extended prompts in Figures 1-4 that are actually passed to the model.

## A.5. Hyperparameters

We provide an overview of our default hyperparameters in Table 7.

## B. Additional experiments

### B.1. Quality-efficiency tradeoff

Extending the experiments in Section 4.3, Figure 11 shows TMD’s performance-efficiency tradeoff when varying both the number of outer and inner steps  $M$  and  $N$  and the flow head layers  $H$ . It shows a general trend of achieving better performance with a larger effective NFE and TMD offers a more fine-grained control over this performance-efficiency tradeoff than DMD2-v.

### B.2. Curvature of Wan trajectories

Inspired by Liu et al. [34], we define the curvature of Wan’s sampling trajectory at time  $t$  as

$$C(\mathbf{v}, t) = \|\mathbf{v}(\mathbf{x}_t, t) - (\mathbf{x} - \mathbf{x}_0)\|^2.$$

Since the model is evaluated on a fixed time grid during sampling, we adopt a discretized version of the curvature in practice, *i.e.*,

$$C(\mathbf{v}, t_i) = \left\| \frac{\tilde{\mathbf{x}}_{t_i} - \tilde{\mathbf{x}}_{t_{i-1}}}{t_i - t_{i-1}} - (\mathbf{x}_1 - \mathbf{x}) \right\|^2,$$

where  $t_i$  denotes the timesteps from Wan’s default 50-step sampling schedule and  $\tilde{\mathbf{x}}_{t_i}$  represents the corresponding intermediate samples along the trajectory.

As shown in Figure 12, the sampling trajectories of the Wan model exhibit extremely large curvature near  $t = 1$  (*i.e.*, the high noise regime), making it difficult for trajectory matching methods to learn the mapping along the ODE path. This also motivates our choice of larger  $\gamma$  in the time-shifting function for  $r_i$  in TM-MF (see Section A.2) and  $t_{\text{student}}$  in DMD2-v (see Section 3.2).

### B.3. Flow head conditioning

Our main experiments use the gating mechanism explained in Section A.1 to condition the flow head on the main backbone’s features  $\mathbf{m} = \mathbf{m}(\mathbf{x}, t)$ . Another version is to concatenate  $\mathbf{m}$  and the patch embeddings of  $\mathbf{y}_s$  along the hidden dimension and then project to the original hidden size using a linear layer. To minimize the impact on the pre-trained model, we initialized the weights of the linear layer as identity for the coordinates corresponding to  $\mathbf{m}$  and as a Gaussian with small standard deviation (0.01) for the remaining coordinates. In Table 9, we see that TMD can achieve strong performance across fusion types. While convergence was more stable using the gating mechanism used for our main experiments (see Figure 13), concatenation is a strong alternative in terms of final performance.

|                                                                                                                                                                                                                                                                                                                                                                                                                 |                                                                                                                                                                                                                                                                                                                                                                                                                                                                                                                                                                                                                     |
|-----------------------------------------------------------------------------------------------------------------------------------------------------------------------------------------------------------------------------------------------------------------------------------------------------------------------------------------------------------------------------------------------------------------|---------------------------------------------------------------------------------------------------------------------------------------------------------------------------------------------------------------------------------------------------------------------------------------------------------------------------------------------------------------------------------------------------------------------------------------------------------------------------------------------------------------------------------------------------------------------------------------------------------------------|
| <i>Figure 1</i>                                                                                                                                                                                                                                                                                                                                                                                                 |                                                                                                                                                                                                                                                                                                                                                                                                                                                                                                                                                                                                                     |
| Short prompt                                                                                                                                                                                                                                                                                                                                                                                                    | <i>A fat rabbit wearing a purple robe walking through a fantasy landscape.</i>                                                                                                                                                                                                                                                                                                                                                                                                                                                                                                                                      |
| Long prompt                                                                                                                                                                                                                                                                                                                                                                                                     | <i>A plump, fluffy rabbit donning a voluminous purple robe walks gracefully through a vibrant fantasy landscape. The rabbit has large, expressive eyes and a gentle, curious expression. Its fur is soft and thick, and the robe drapes elegantly over its body. The landscape features rolling hills covered in lush green grass, colorful wildflowers, and towering magical trees with shimmering leaves. In the distance, there are sparkling waterfalls and mystical castles. The scene is bathed in warm, golden sunlight. Medium shot, focusing on the rabbit's walk through the picturesque environment.</i> |
| Short prompt                                                                                                                                                                                                                                                                                                                                                                                                    | <i>A person drinking coffee in a café.</i>                                                                                                                                                                                                                                                                                                                                                                                                                                                                                                                                                                          |
| Long prompt                                                                                                                                                                                                                                                                                                                                                                                                     | <i>A cozy, warm café setting with soft ambient lighting and wooden furnishings. A young adult, casually dressed in a sweater and jeans, sits at a small round table. They hold a steaming cup of coffee in their hand, taking a sip while looking pensively out the window. The café is moderately busy with other patrons engaged in conversations. The background showcases various coffee drinks and pastries displayed on a counter. The person's expression is relaxed and content. Medium shot focusing on the person's face and the coffee cup, capturing the intimate atmosphere of the café.</i>           |
| <i>Figure 3</i>                                                                                                                                                                                                                                                                                                                                                                                                 |                                                                                                                                                                                                                                                                                                                                                                                                                                                                                                                                                                                                                     |
| Short prompt                                                                                                                                                                                                                                                                                                                                                                                                    | <i>A person is laughing.</i>                                                                                                                                                                                                                                                                                                                                                                                                                                                                                                                                                                                        |
| Long prompt                                                                                                                                                                                                                                                                                                                                                                                                     | <i>A joyful person is laughing heartily, with a broad smile and crinkled eyes, conveying pure happiness. They are standing upright with arms spread wide, as if embracing the world around them. The scene is set outdoors in a sunny park, surrounded by lush greenery and blooming flowers. The background includes a clear blue sky with fluffy clouds, adding to the cheerful atmosphere. Medium shot capturing the full body of the person, focusing on their animated facial expressions and gestures.</i>                                                                                                    |
| Short prompt                                                                                                                                                                                                                                                                                                                                                                                                    | <i>A steam train moving on a mountainside.</i>                                                                                                                                                                                                                                                                                                                                                                                                                                                                                                                                                                      |
| Long prompt                                                                                                                                                                                                                                                                                                                                                                                                     | <i>A vintage steam locomotive chugging along a winding track on a mountainous terrain. The train is covered in soot, with steam billowing from its smokestack as it navigates the rugged landscape. The surrounding mountains are steep and lush, with patches of snow visible at higher elevations. The train cars sway gently as they follow the curving tracks, and the scenery outside the windows shows dense forests and rocky cliffs. The camera follows the train from a medium distance, capturing the train's movement and the dramatic backdrop.</i>                                                     |
| <i>Figure 4</i>                                                                                                                                                                                                                                                                                                                                                                                                 |                                                                                                                                                                                                                                                                                                                                                                                                                                                                                                                                                                                                                     |
| Short prompt                                                                                                                                                                                                                                                                                                                                                                                                    | <i>A boat sailing leisurely along the Seine River with the Eiffel Tower in background.</i>                                                                                                                                                                                                                                                                                                                                                                                                                                                                                                                          |
| Long prompt                                                                                                                                                                                                                                                                                                                                                                                                     | <i>A serene, picturesque scene of a small wooden boat gently gliding along the Seine River in Paris, France. The boat is rowed leisurely by a middle-aged man in a casual striped shirt and khaki pants, who rows smoothly with rhythmic strokes. The Eiffel Tower stands majestically in the background, partially visible through the misty morning air. The riverbank is lined with lush green trees and quaint buildings, reflecting off the calm waters. The overall atmosphere is peaceful and tranquil, capturing the essence of a lazy summer day. Wide shot, static camera.</i>                            |
| Short prompt                                                                                                                                                                                                                                                                                                                                                                                                    | <i>An astronaut flying in space, zoom out.</i>                                                                                                                                                                                                                                                                                                                                                                                                                                                                                                                                                                      |
| Long prompt                                                                                                                                                                                                                                                                                                                                                                                                     | <i>Astronaut floating in space with a helmet visor reflecting Earth below. The astronaut, wearing a full spacesuit with the American flag on the shoulder, is performing a spacewalk, arms extended as if in motion. The background shows the vastness of space with stars twinkling and Earth in the distance. The scene begins with a close-up of the astronaut and gradually zooms out to reveal the enormity of space surrounding them. Wide shot, showcasing the astronaut against the backdrop of the universe.</i>                                                                                           |
| <i>Negative prompt</i>                                                                                                                                                                                                                                                                                                                                                                                          |                                                                                                                                                                                                                                                                                                                                                                                                                                                                                                                                                                                                                     |
| <i>Bright tones, overexposed, static, blurred details, subtitles, style, works, paintings, images, static, overall gray, worst quality, low quality, JPEG compression residue, ugly, incomplete, extra fingers, poorly drawn hands, poorly drawn faces, deformed, disfigured, misshapen limbs, fused fingers, still picture, messy background, three legs, many people in the background, walking backwards</i> |                                                                                                                                                                                                                                                                                                                                                                                                                                                                                                                                                                                                                     |

Table 8. Extended prompts used in the figures from the main text and negative prompt used for CFG (in teacher sampling, KD, and DMD2-v) and condition dropout (in TM-MF), taken from the official Wan repository.

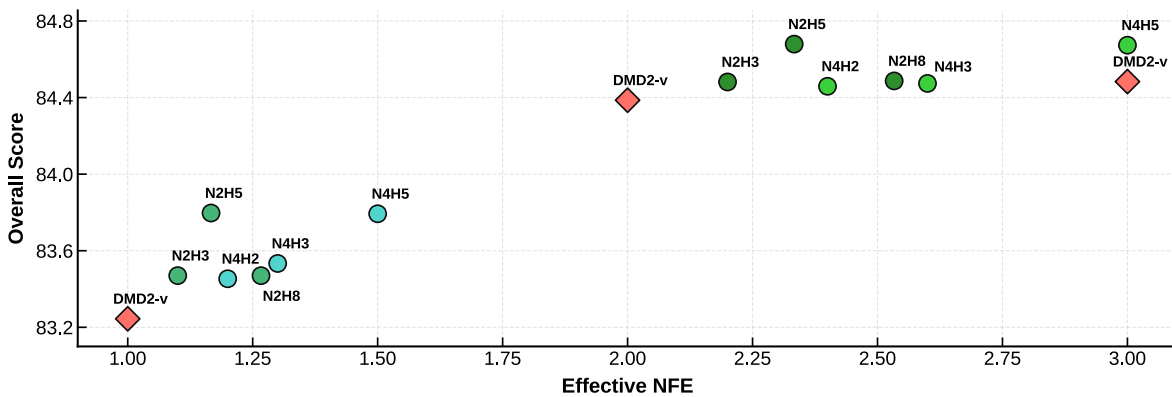

Figure 11. Performance-efficiency tradeoff of TMD. Extension of Figure 6 to include the  $M = 1$  settings.

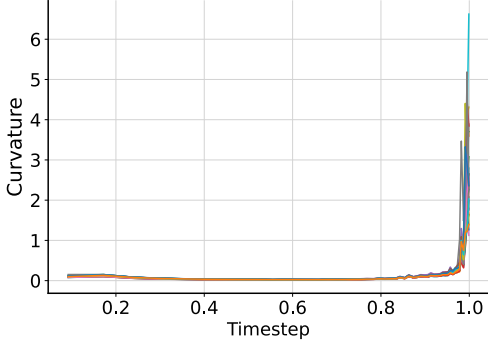

Figure 12. **Curvature of Wan trajectories.** Curvature of different sampling trajectories for the Wan2.1 1.3B model. Large trajectory curvatures are observed near  $t = 1$  (*i.e.*, the high noise regime).

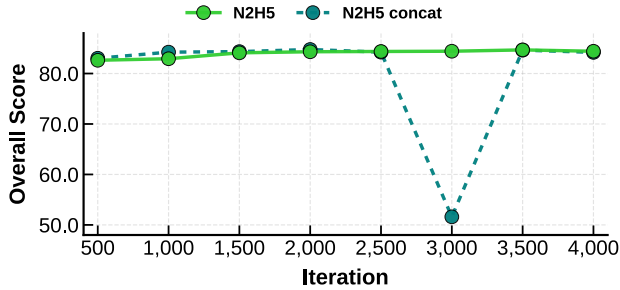

Figure 13. **Convergence and fusion ablation.** We compare the overall VBench score over iterations for the second-stage TMD training with our gating mechanism (see Section A.1) and concatenation of features (see Section B.3). While concatenation yields very competitive results, we observed that it introduces some training instabilities.

| Setting | Fusion type             | Overall score | Quality score | Semantic score |
|---------|-------------------------|---------------|---------------|----------------|
| N2H5    | Gated (see Section A.1) | 84.68         | 85.71         | 80.55          |
|         | Concat                  | <b>84.76</b>  | <b>85.77</b>  | <b>80.71</b>   |
| N4H5    | Gated (see Section A.1) | <b>84.67</b>  | 85.72         | <b>80.47</b>   |
|         | Concat                  | 84.66         | <b>85.79</b>  | 80.14          |

Table 9. Impact of the fusion type on the final performance when distilling Wan2.1 1.3B with  $M = 2$ .

#### B.4. Inner flow targets

In principle, the auxiliary latent variable  $\mathbf{y}$  in the inner flow can be chosen arbitrarily as long as  $\mathbf{x}_{t_{i-1}}$  is easy to sample given  $\mathbf{y}$  and  $\mathbf{x}_{t_i}$ . While we chose the DTM formulation  $\mathbf{y} := \mathbf{x}_1 - \mathbf{x}$  in (3) for our main experiments, we also experimented with other versions. While other formulations did not improve the overall performance, they could still achieve competitive performance. For instance, Table 10 provides results for the simple choice  $\mathbf{y} := \mathbf{x}$ . Similar

to (14) and (17), we parametrize the average velocity as

$$\mathbf{u}_\theta(\mathbf{y}_s, s, r; \mathbf{m}) := \frac{\mathbf{y}_s - (\mathbf{x}_{t_i} - t_i \text{head}_\theta(\mathbf{y}_s, s, r; \mathbf{m}))}{s}$$

where  $\mathbf{m} = \mathbf{m}_\theta(x_{t_i}, t_i)$  denote the main features.

#### B.5. Impact of recurrence in flow head

To evaluate the effect of recurrence in the flow head, we manually restrict the inner flow to a single step at inference (N1H5) and compare the results with the standard recurrent setting (N4H5). As shown in Figure 14, when distilling Wan2.1 1.3B into a two-step generator, the non-recurrent variant produces noticeably lower-quality videos, exhibiting stronger artifacts and blurriness. This highlights the importance of iterative refinement within the flow head for high-fidelity generation.

| Setting | Target $\mathbf{y}$               | Overall score | Quality score | Semantic score |
|---------|-----------------------------------|---------------|---------------|----------------|
| N2H5    | $\mathbf{x}_1 - \mathbf{x}$ (DTM) | <b>84.68</b>  | <b>85.71</b>  | <b>80.55</b>   |
|         | $\mathbf{x}$                      | 84.18         | 85.15         | 80.33          |
| N4H5    | $\mathbf{x}_1 - \mathbf{x}$ (DTM) | <b>84.67</b>  | <b>85.72</b>  | 80.47          |
|         | $\mathbf{x}$                      | 84.44         | 85.36         | <b>80.77</b>   |

Table 10. Impact of the inner flow target when distilling Wan2.1 1.3B with  $M = 2$ .

#### B.6. DMD2 comparisons

In Section 3.2, we observed that KD pretaining is only helpful for one-step distillation (see Table 4 and Figure 9) and that timestep shifting of  $t_{\text{dmd}}$  and  $t_{\text{student}}$  is crucial for good performance for one- and two-step DMD2- $v$  (see Table 5 and Figure 10). In this section, we provide additional ablations on our DMD2- $v$  baseline when using  $\geq 3$  steps. While the timestep shifting for  $t_{\text{dmd}}$  and  $t_{\text{student}}$  remain important, we observed that slightly lower shift values for  $t_{\text{student}}$  can attain better scores when using more steps. In particular, for 4 steps, we picked a shift value of  $\gamma = 5$  for  $t_{\text{student}}$ , outperforming the DMD2 baseline in [69]; see Table 11.

| Method    | shift $t_{\text{student}}$ | NFE | Overall score | Quality score | Semantic score |
|-----------|----------------------------|-----|---------------|---------------|----------------|
| DMD2 [69] |                            | 4   | 84.56         | 85.58         | <b>80.50</b>   |
| DMD2- $v$ | 10                         | 4   | 84.53         | 85.95         | 78.84          |
| DMD2- $v$ | 5                          | 4   | <b>84.60</b>  | <b>86.03</b>  | 79.87          |
| DMD2- $v$ | 10                         | 3   | <b>84.48</b>  | <b>85.71</b>  | 79.58          |
| DMD2- $v$ | 5                          | 3   | 84.47         | 85.55         | <b>80.15</b>   |

Table 11. VBench results of the DMD2 version in [69] and our DMD2- $v$  for 3 and 4 steps with different timestep shifts for  $t_{\text{student}}$ .

#### B.7. Inference time

In Table Table 12, we measure the inference time of our proposed decoupled architecture to confirm that the flow head

is lightweight compared to the backbone. Moreover, the gray columns validate the usage of *effective* NFE for evaluating efficiency, since the increase in the per-step inference time closely matches the effective NFE.

| Setting     | Backbone | Head | Fusion | Total | Increase | NFE  |
|-------------|----------|------|--------|-------|----------|------|
| N4H5 (1.3B) | 783      | 156  | 4.8    | 1426  | 1.51x    | 1.5  |
| N2H5 (1.3B) | 781      | 155  | 4.7    | 1100  | 1.17x    | 1.17 |
| N4H5 (14B)  | 4191     | 595  | 29     | 6687  | 1.4x     | 1.38 |

Table 12. Inference time (in milliseconds) of different architecture components with  $M = 1$  and batch-size 1 on a single H100 GPU. The increase in inference time (second-to-last column) is measured relative to a standard forward pass of the teacher model and closely matches the effective NFE (last column).

### B.8. Training iterations

We note that TMD is training-efficient compared to other baselines. For instance, for Wan2.1 14B and  $M = 2$  we only require 3k iterations of lightweight TM-MF pretraining and 1k iterations of distribution matching, whereas rCM uses 10k iterations (with VSD and sCM losses) [69]. For Wan2.1 1.3B, we show in Table 13 that even with significantly reduced number of TM-MF iterations, TMD still outperforms rCM and DMD2-v.

| Method   | TM-MF (iters) | Distill (iters) | Overall score | Quality score | Semantic score |
|----------|---------------|-----------------|---------------|---------------|----------------|
| rCM [69] | -             | 10k             | 84.09         | 84.90         | <b>80.86</b>   |
| DMD2-v   | -             | <6k             | 84.39         | <u>85.65</u>  | 79.32          |
| TMD-N2H5 | 0.5k          | <6k             | 84.52         | <u>85.65</u>  | 79.99          |
| TMD-N2H5 | 1k            | <6k             | <u>84.59</u>  | 85.57         | <u>80.68</u>   |
| TMD-N2H5 | 3k            | <6k             | <b>84.68</b>  | <b>85.71</b>  | 80.55          |

Table 13. Comparison of VBench scores for distilling Wan2.1 1.3B using TMD ( $M = 2$ ) with a varying number of TM-MF pretraining iterations against two-step baselines.

### B.9. More visual comparison results

We provide further visual comparisons between the 50-step teacher models with classifier-free guidance (CFG), DMD2-v, and TMD in Figures 15 to 20.

A joyful child, with a big smile and arms spread wide, swings energetically on a rusty old swing set in a sunlit backyard. The swing set, with peeling paint and creaking chains, contrasts against the vibrant green grass and blooming flowers surrounding it. The child's laughter echoes as they swing higher and higher, their feet barely touching the ground at the bottom of each arc.

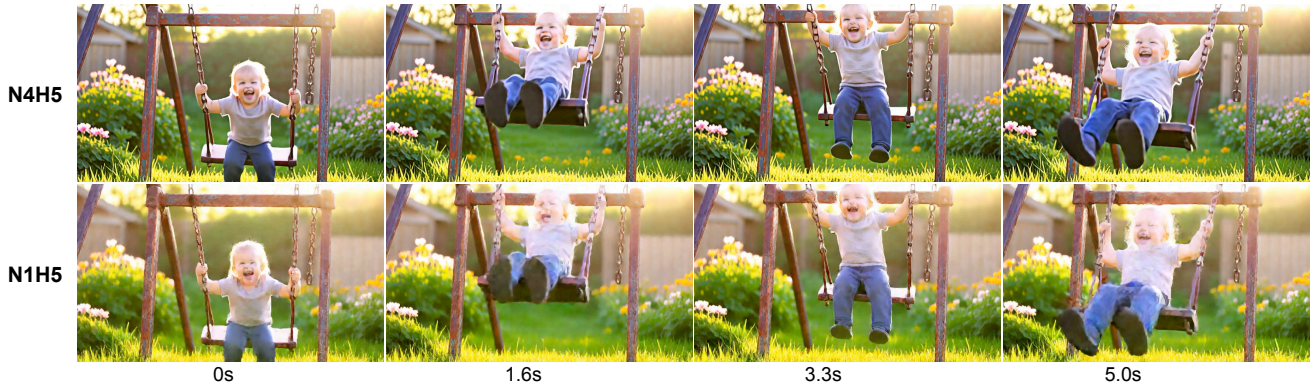

Impressionist style, a single yellow rubber duck gently floating on undulating waves at sunset. The duck has a cheerful smile painted on its face, with sunlight casting warm, golden hues across the water. The sky is filled with soft, pastel shades of orange, pink, and purple, reflecting off the rippling surface. The water appears calm yet lively, with subtle waves carrying the duck along smoothly.

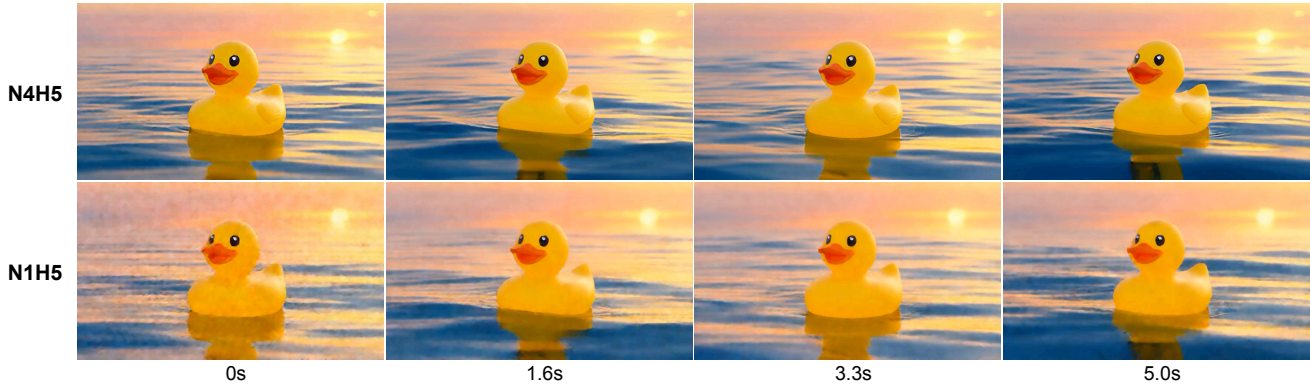

Figure 14. **Impact of flow head recurrence.** We show the impact of recurrence in the flow head by setting the number of flow head steps to 1 only at inference (*i.e.*, N1H5) when distilling Wan2.1 1.3B with  $M = 2$  and the N4H5 setting for flow head (*i.e.*, 4 denoising steps and 5 DiT blocks in flow head). We observe that the videos generated without recurrence (marked by N1H5) are of much lower quality (*e.g.*, more artifacts and blurriness) than ones with recurrence (marked by N4H5), implying the importance of the fine-grained iterative refinement on our method.

A person enjoying a juicy burger, with a satisfied smile on their face. They are seated at a casual dining table, surrounded by napkins and a drink. The burger is topped with lettuce, tomato, and cheese, and the person is taking a bite, showcasing the delicious layers inside. The scene has a warm, inviting atmosphere with soft lighting and a cozy background. Medium close-up shot focusing on the person's hand holding the burger and their facial expressions as they savor each bite.

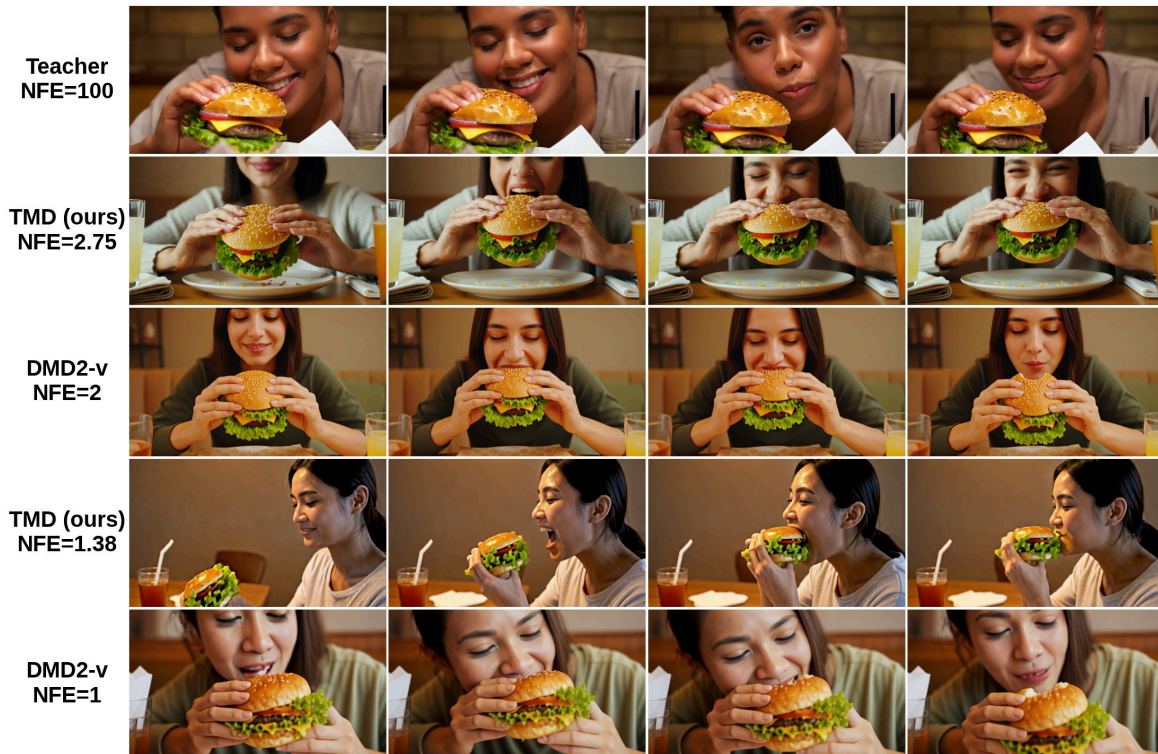

A person is skydiving from a plane, descending towards the ground. They are mid-air, arms spread wide, with a parachute deployed and open, ensuring a smooth descent. The skydiver is wearing a jumpsuit and helmet, with a determined and exhilarated expression on their face. The background shows a clear blue sky with fluffy clouds and the landscape below stretching out, including patches of green fields and distant mountains. The scene captures the moment just after exiting the plane, with the parachute fully inflated, showcasing the thrill and freedom of skydiving. Mid-shot, focusing on the skydiver against the expansive sky.

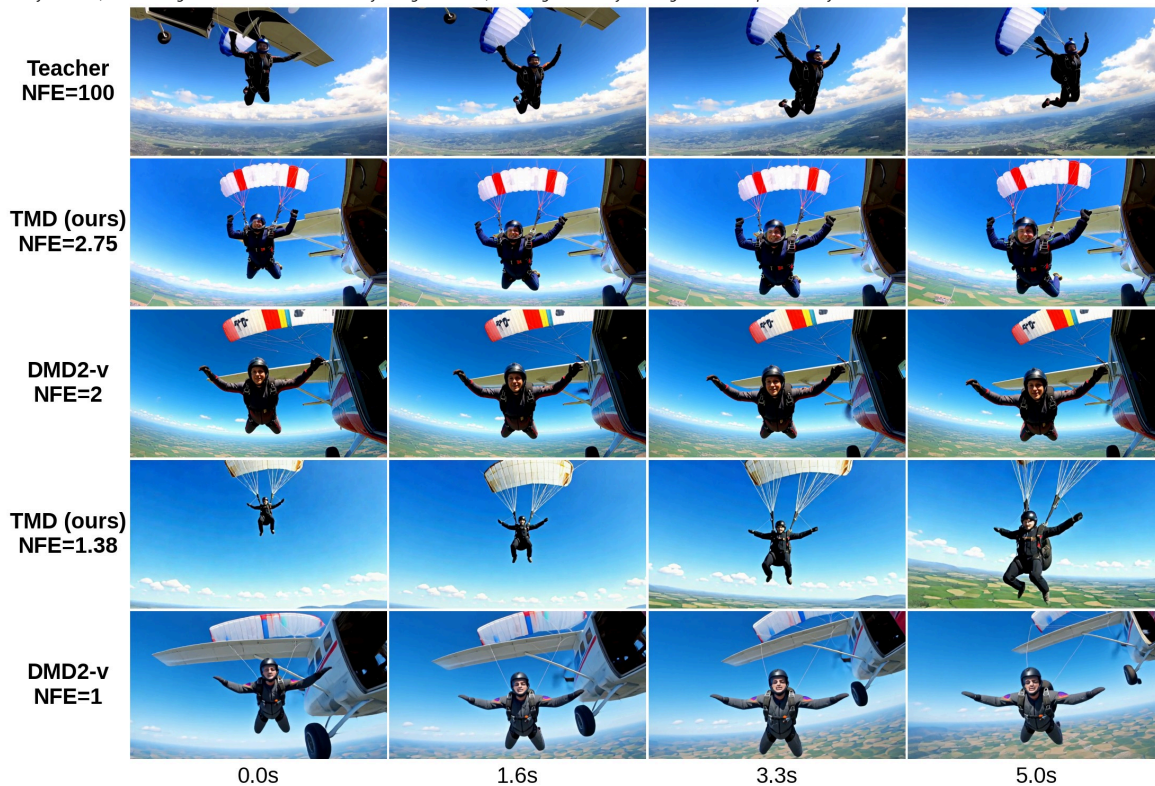

Figure 15. Visual comparison on Wan2.1 14B. We compare the outputs of the teacher, TMD, and DMD2-v on exemplary prompts.

A serene African savanna scene with tall grasses and scattered trees. A tall giraffe, with distinctive brown spots on its creamy white coat, bends its long neck gracefully to drink from a calm river. The giraffe's gaze is focused intently on the water as it lowers its head, revealing its long eyelashes and gentle expression. The river reflects the golden hues of the late afternoon sun, casting a warm glow over the scene. The background shows the vast expanse of the savanna with distant hills. The video is a medium close-up, capturing the giraffe's elegant movement and the tranquil environment.

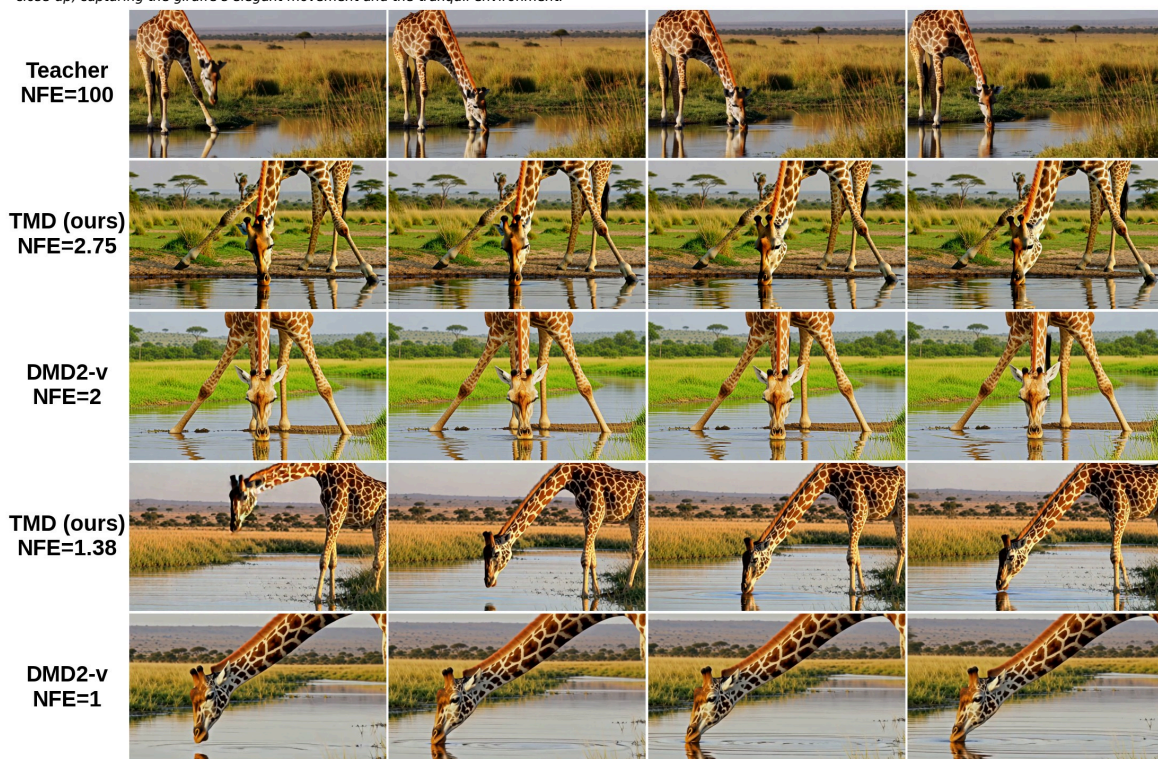

A large great white shark is swimming gracefully through the vast, deep blue ocean. Its sleek, muscular body cuts through the water as it propels forward with powerful tail strokes. The shark's dorsal fin slices through the surface, while smaller fish dart around it. The camera begins at a wide shot of the shark and the surrounding ocean, then smoothly zooms in to focus closely on the shark's sharp teeth and piercing eyes. The scene is filled with sunlight filtering through the water, creating a dynamic interplay of light and shadow. Close-up underwater perspective.

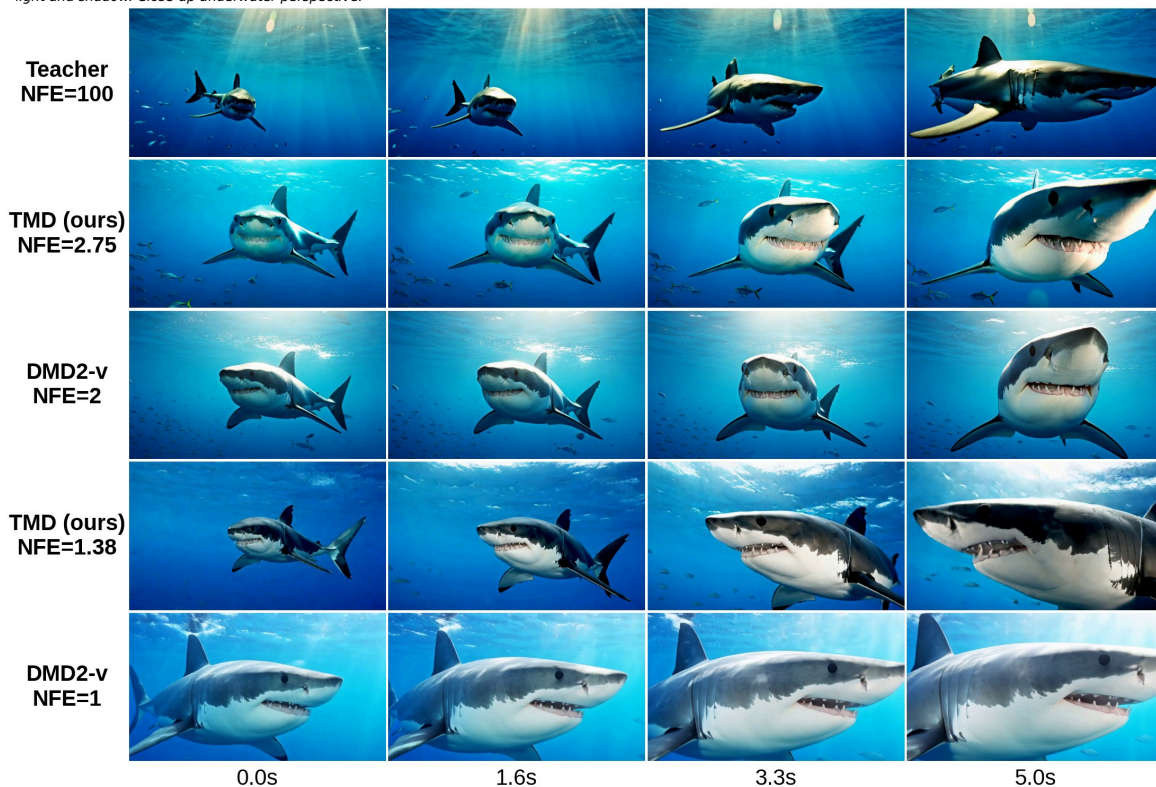

Figure 16. Visual comparison on Wan2.1 14B. We compare the outputs of the teacher, TMD, and DMD2-v on exemplary prompts.

A happy, playful Corgi running and jumping in a park during sunset, captured in black and white. The Corgi has a friendly face with floppy ears and a wagging tail as it moves through the grassy area. The sky behind the dog shows soft gradients of orange and pink fading into shades of gray and black. The park includes a few trees and benches in the background, adding depth to the scene. The Corgi is in motion, emphasizing its joyful playfulness. Medium close-up shot, focusing on the Corgi's expressive face and body language.

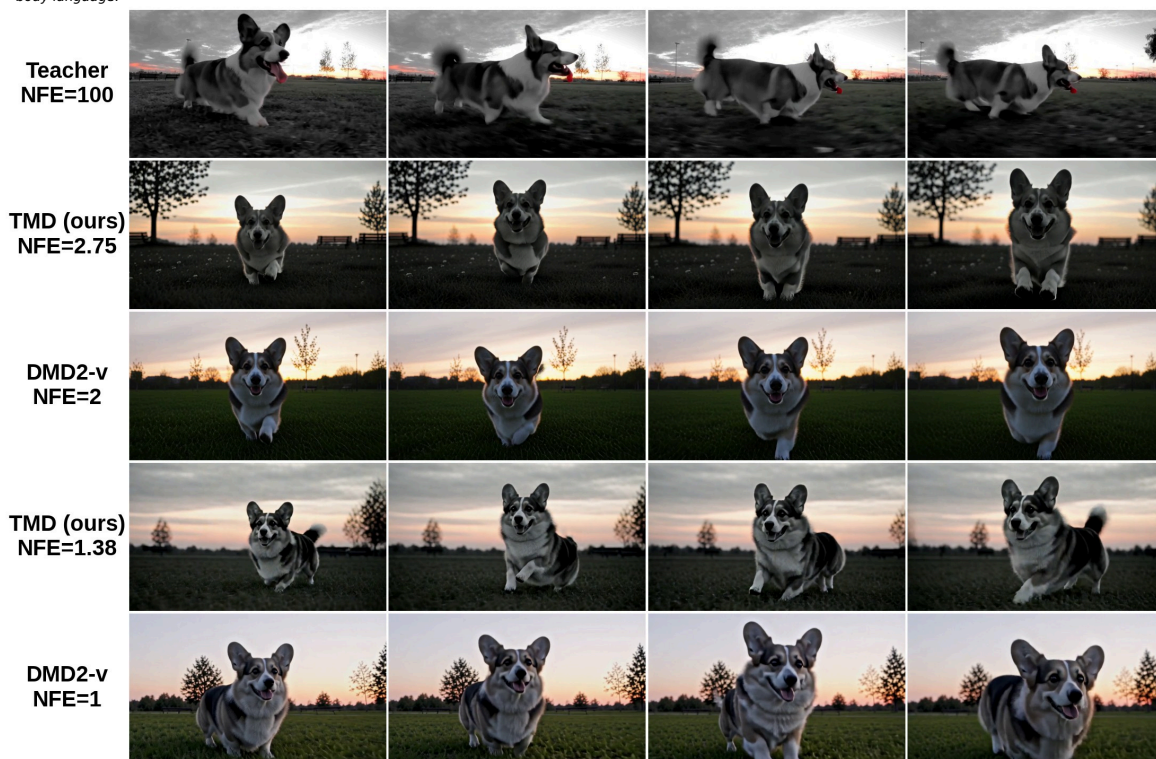

A stormtrooper from the Star Wars universe, clad in pristine white armor with a black helmet, is meticulously vacuuming a sandy beach. He bends down slightly, moving the vacuum cleaner back and forth across the sand with purposeful motions. His gloved hand firmly grips the handle of the vacuum as he navigates around rocks and debris. The sun sets behind him, casting long shadows and giving the scene a dramatic, golden glow. The background shows crashing waves and seagulls flying overhead. Medium close-up shot, focusing on the stormtrooper's actions and the sweeping motion of the vacuum.

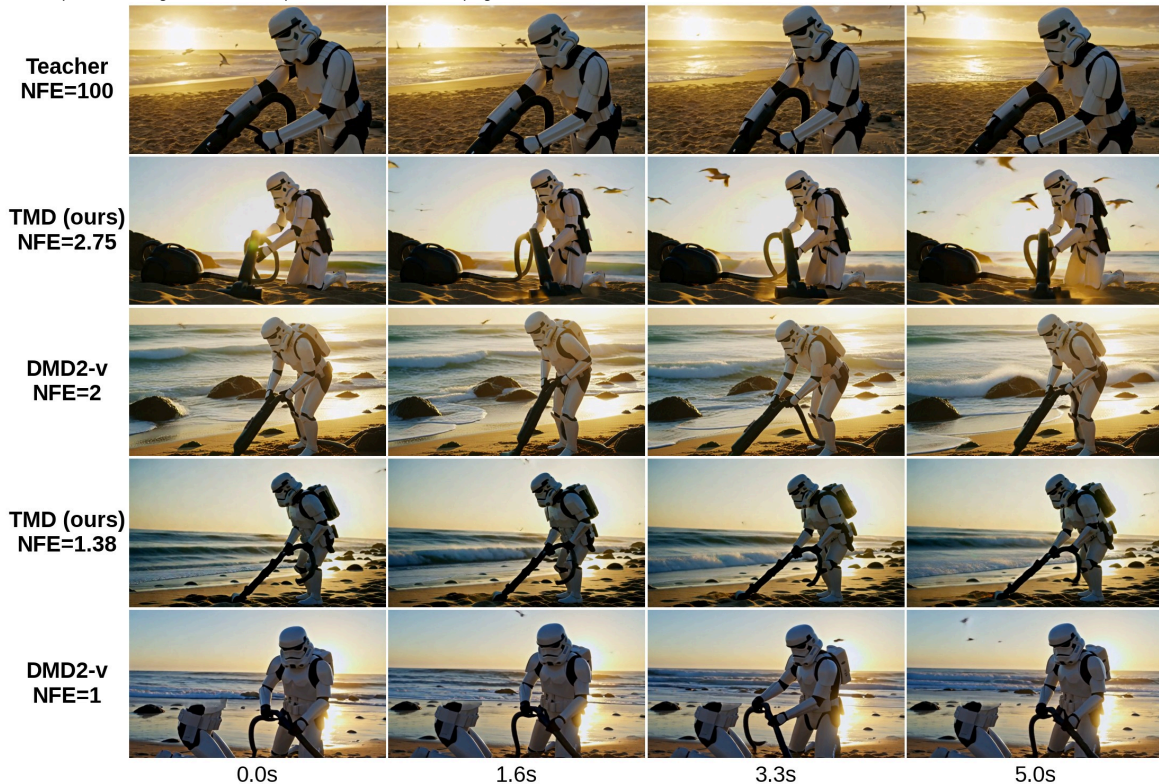

Figure 17. Visual comparison on Wan2.1 14B. We compare the outputs of the teacher, TMD, and DMD2-v on exemplary prompts.

A person is roller skating in an urban park, moving smoothly across the paved path. They wear a black helmet with a visor and knee pads, elbow pads, and wrist guards for safety. The skater has medium-length brown hair tied back in a ponytail and wears a bright yellow shirt with a graphic design and black shorts. They maintain a slight crouch posture as they glide, their feet making fluid movements, propelling them forward effortlessly. The background shows other park-goers walking dogs and children playing, adding a lively atmosphere. Medium shot focusing on the skater from a side angle, capturing the motion and environment.

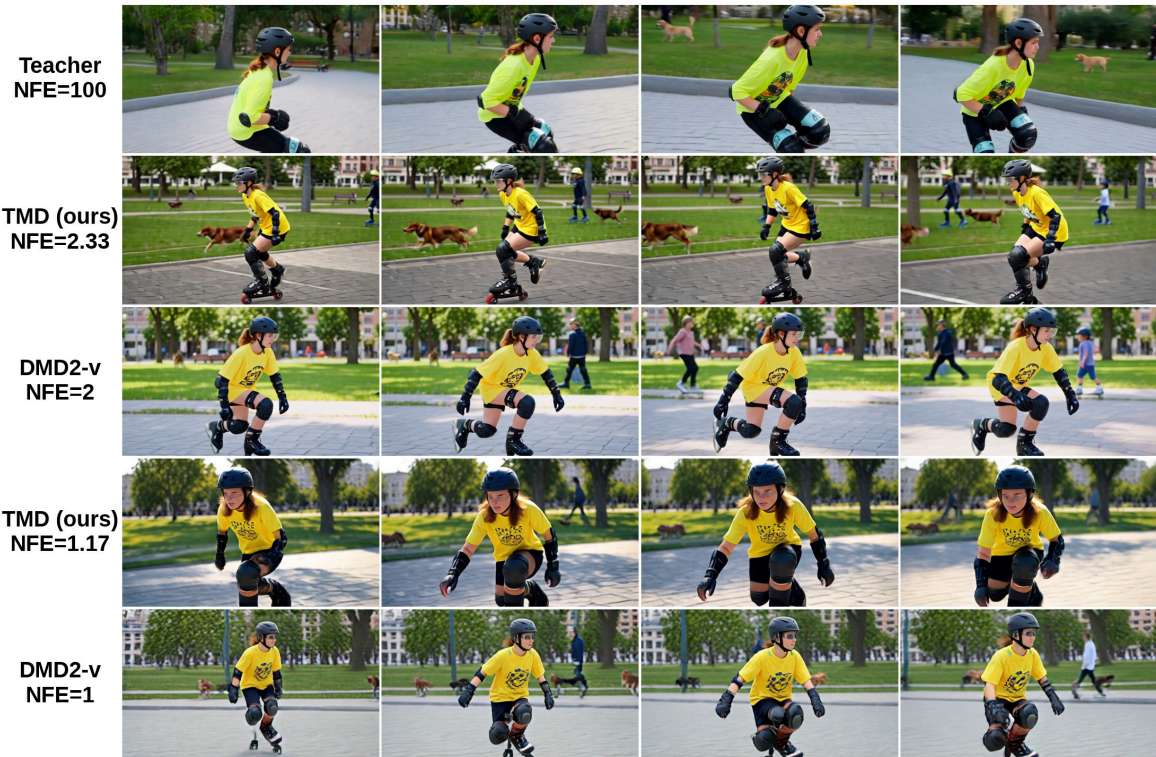

A koala bear playing a grand piano in a lush, dense forest. The koala has soft, grey fur and large, round ears. It sits upright on the piano bench, paws delicately placed on the keys, creating gentle melodies. The forest background is filled with tall eucalyptus trees, dappled sunlight filtering through the leaves, and a carpet of green moss beneath the piano. The scene is calm and serene, with the koala focused intently on its performance. Medium close-up shot, capturing the koala and part of the forest surroundings.

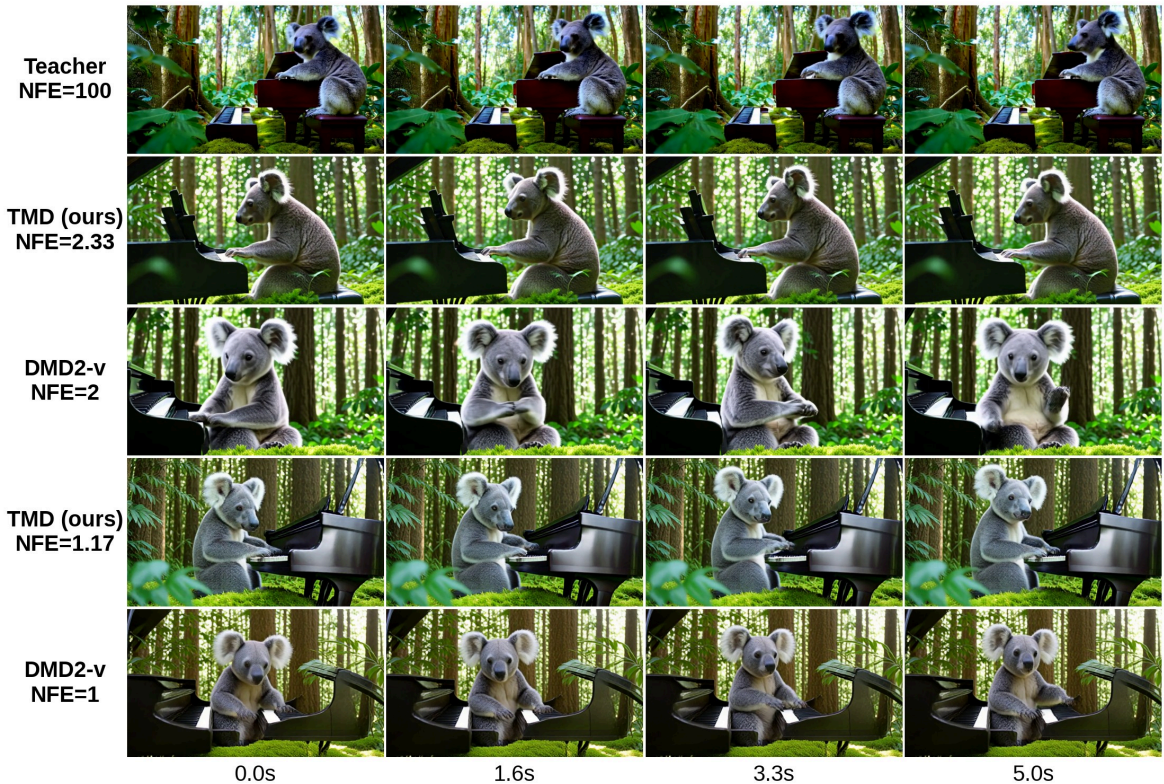

Figure 18. **Visual comparison on Wan2.1 1.3B.** We compare the outputs of the teacher, TMD, and DMD2-v on exemplary prompts.

A large, hairy Bigfoot creature walking through a heavy snowstorm. The Bigfoot stands at least eight feet tall, covered in shaggy brown fur, with muscular limbs and a stooped posture. Snowflakes swirl around him as he moves slowly and deliberately through the dense forest, his feet sinking slightly into the deep snow. The landscape is bleak and desolate, with bare trees and thick snowdrifts. The atmosphere is eerie and quiet, with only the sound of crunching snow and howling wind. The scene is captured in a mid-shot, focusing on the Bigfoot's powerful form as he trudges through the storm.

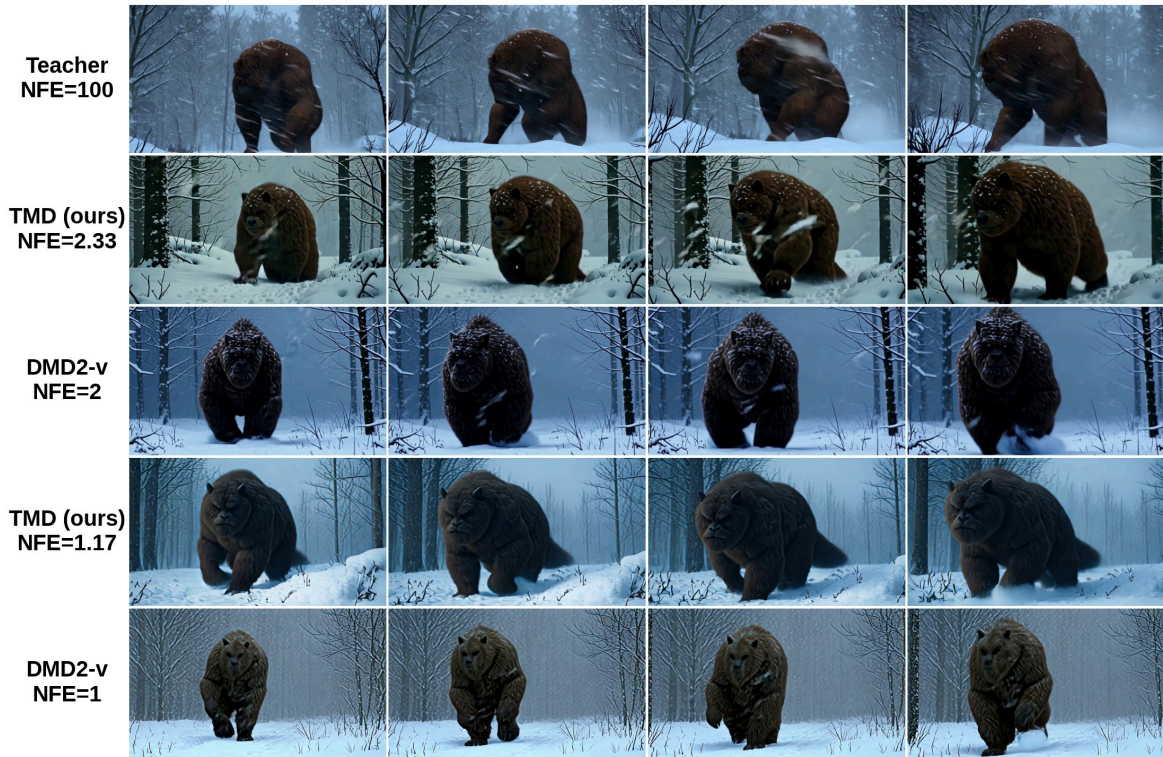

An animated scene of a panda drinking coffee in a cozy café in Paris. The panda is sitting at a small table with a steaming cup of coffee, holding a spoon delicately. The café has vintage decor with wooden furniture, soft lighting, and a few other patrons in the background. The panda has a relaxed and content expression, sipping the coffee slowly. The atmosphere is warm and inviting, with the soft hum of conversation in the background. Medium shot focusing on the panda and the coffee cup.

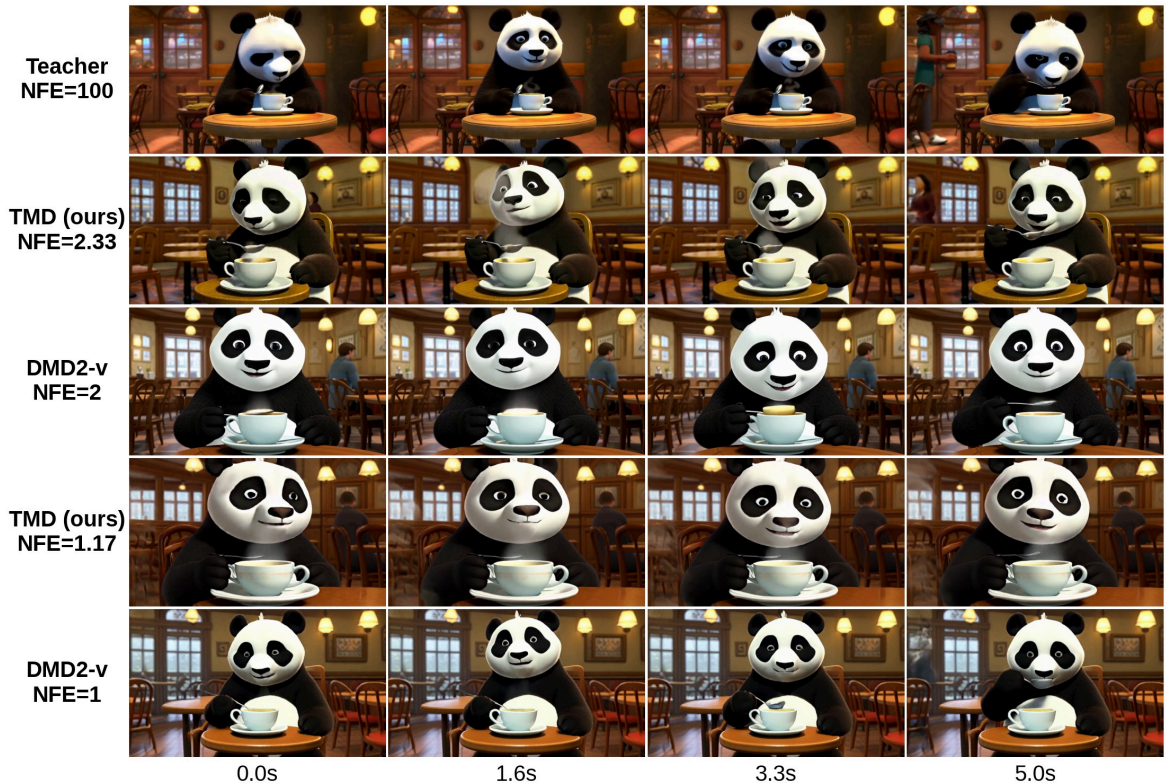

Figure 19. Visual comparison on Wan2.1 1.3B. We compare the outputs of the teacher, TMD, and DMD2-v on exemplary prompts.

A dramatic and intense scene featuring an erupting volcano. The volcano is spewing lava and ash into the air, creating a vivid orange glow against a dark night sky filled with billowing smoke clouds. The ground trembles as molten rock flows down the sides of the volcano, lighting up the surrounding landscape. In the foreground, a few scattered trees and rocks are illuminated by the fiery eruption. The camera remains fixed on the volcano, capturing the powerful motion and scale of the event. Nighttime, wide shot.

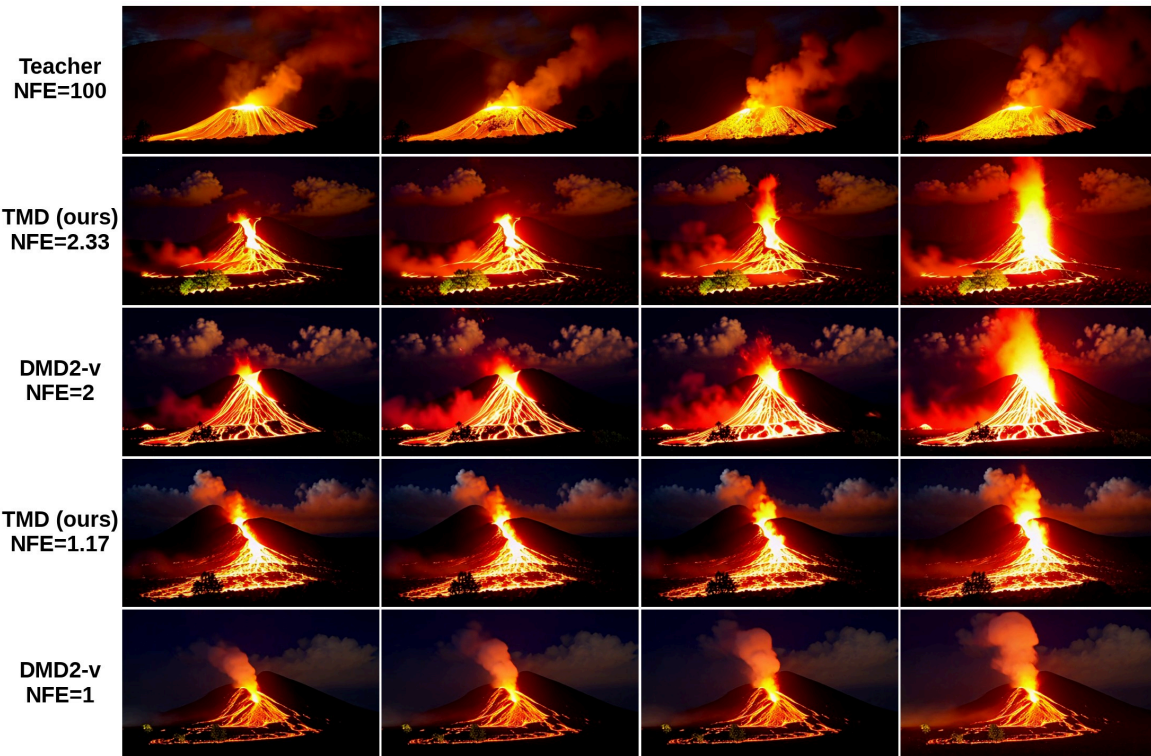

A realistic classroom scene set during a typical school day. The classroom has rows of desks facing a chalkboard at the front. Students are engaged in various activities; some are reading books, others are writing in notebooks, and a few are quietly talking. The teacher stands at the front of the class, holding a book and addressing the students. The room is well-lit with sunlight streaming in from large windows, casting soft shadows across the desks. The walls are adorned with educational posters and motivational quotes. Medium shot capturing the full classroom environment.

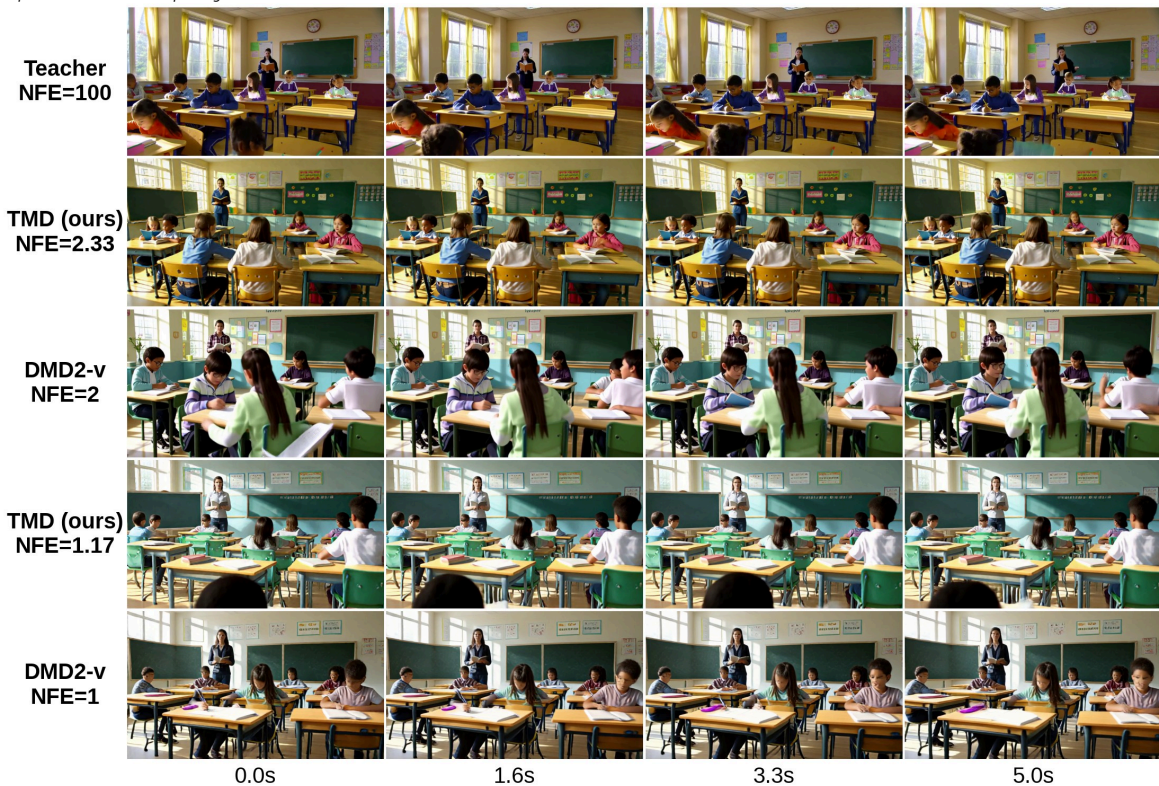

Figure 20. Visual comparison on Wan2.1 1.3B. We compare the outputs of the teacher, TMD, and DMD2-v on exemplary prompts.

Prompt: A warm and tender moment captured in a close-up shot, featuring a person embracing another person in a tight hug. Both individuals have their arms wrapped around each other, with one person's head resting gently on the other's shoulder. They appear to be sharing a loving and emotional connection. The scene is set in a cozy, dimly lit room with soft ambient lighting, creating a serene and intimate atmosphere. The focus is on the expressions of affection and comfort displayed through body language and facial expressions, conveying a sense of security and warmth.

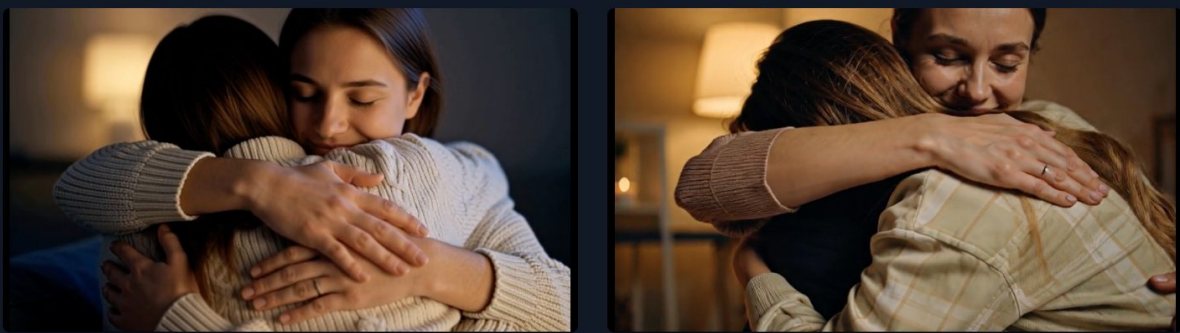

#### Visual Quality

How realistic, clear, and visually pleasing the video looks. We prefer videos with **sharper object appearance**, **richer background**, **larger and smoother motion**, and **more realistic scene**.

← Left

Right →

#### Prompt Alignment

How well the video matches the given text prompt. Includes the correct depiction of the **described objects**, **actions**, **scenes**, **background**, **spatial relation** and **overall style**.

← Left

Right →

Figure 21. **User study interface.** Screenshot of our user preference study interface explained in Section 4.2.
